# Supplementary material for: Inclusion Complexes of Non-Steroidal Anti-Inflammatory Drugs with Cyclodextrins: A Systematic Review
Source: PubMed Central journal article supplement (PMC7996898; doi:10.3390/biom11030361), 2021-02-27
Supplement: biomolecules-11-00361-s001.pdf [file biomolecules-11-00361-s001.pdf]

## Supplementary Material

**Table 1. Frequencies for Publication Year (2010/01/01 to 2020/02/05)**

| Publication Year | Frequency | Percent |
|------------------|-----------|---------|
| 2010             | 8         | 10.000  |
| 2011             | 10        | 12.500  |
| 2012             | 6         | 7.500   |
| 2013             | 9         | 11.250  |
| 2014             | 5         | 6.250   |
| 2015             | 5         | 6.250   |
| 2016             | 11        | 13.750  |
| 2017             | 9         | 11.250  |
| 2018             | 6         | 7.500   |
| 2019             | 6         | 7.500   |
| 2020             | 5         | 6.250   |
| Total            | 80        | 100.000 |

**Figure 1. Publication Year (2010/01/01 to 2020/02/05)**

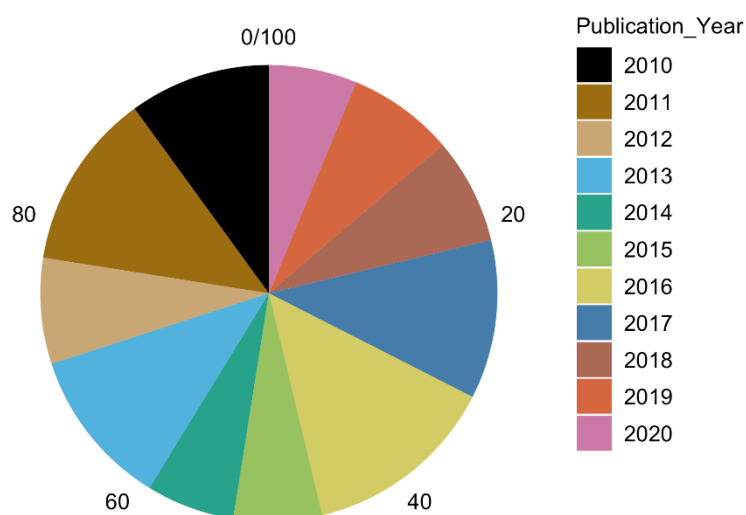

**Table 2. Frequencies for NSAID**

| NSAID                 | Frequency | Percent |
|-----------------------|-----------|---------|
| 4-Aminosalicylic acid | 1         | 1.176   |
| Aceclofenac           | 6         | 7.059   |
| Carprofen             | 1         | 1.176   |

**Table 2. Frequencies for NSAID**

| <b>NSAID</b>    | <b>Frequency</b> | <b>Percent</b> |
|-----------------|------------------|----------------|
| Celecoxib       | 4                | 4.706          |
| Dexibuprofen    | 2                | 2.353          |
| Diclofenac      | 8                | 9.412          |
| Etodolac        | 2                | 2.353          |
| Etoricoxib      | 1                | 1.176          |
| Fenoprofen      | 1                | 1.176          |
| Flufenamic Acid | 1                | 1.176          |
| Flurbiprofen    | 8                | 9.412          |
| Ibuprofen       | 7                | 8.235          |
| Indomethacin    | 4                | 4.706          |
| Ketoprofen      | 3                | 3.529          |
| Lornoxicam      | 3                | 3.529          |
| Meloxicam       | 11               | 12.941         |
| Mesalazine      | 1                | 1.176          |
| Naproxen        | 2                | 2.353          |
| Nepafenac       | 3                | 3.529          |
| Nimesulide      | 1                | 1.176          |
| Oxaprozin       | 6                | 7.059          |
| Piroxicam       | 7                | 8.235          |
| Sulindac        | 1                | 1.176          |
| Zaltoprofen     | 1                | 1.176          |
| Missing         | 0                | 0.000          |
| Total           | 85               | 100.000        |

**Table 3. Frequencies for Cyclodextrin**

| <b>Cyclodextrin</b> | <b>Frequency</b> | <b>Percent</b> |
|---------------------|------------------|----------------|
| 2-HB-CD             | 1                | 0.870          |
| DiMe- $\beta$ -CD   | 1                | 0.870          |
| EPI-CM $\beta$ CD   | 1                | 0.870          |
| EPI- $\beta$ CD     | 1                | 0.870          |
| HP $\beta$ -CD      | 40               | 34.783         |
| Me- $\beta$ -CD     | 6                | 5.217          |
| Rme- $\beta$ -CD    | 5                | 4.348          |
| SBE- $\beta$ -CD    | 3                | 2.609          |
| TA- $\beta$ -CD     | 1                | 0.870          |
| $\alpha$ -CD        | 3                | 2.609          |
| $\beta$ -CD         | 46               | 40.000         |
| $\gamma$ -CD        | 7                | 6.087          |
| Total               | 115              | 100.000        |

**Table 4. Frequencies for Complexation**

| <b>Complexation</b>                  | <b>Frequency Percent</b> |       |
|--------------------------------------|--------------------------|-------|
| 4-Aminosalicylic acid/HP $\beta$ -CD | 1                        | 0.870 |
| 4-Aminosalicylic acid/ $\alpha$ -CD  | 1                        | 0.870 |
| 4-Aminosalicylic acid/ $\beta$ -CD   | 1                        | 0.870 |
| 4-Aminosalicylic acid/ $\gamma$ -CD  | 1                        | 0.870 |
| Aceclofenac/HP $\beta$ -CD           | 3                        | 2.609 |
| Aceclofenac/SBE- $\beta$ -CD         | 1                        | 0.870 |
| Aceclofenac/ $\beta$ -CD             | 3                        | 2.609 |
| Carprofen/HP $\beta$ -CD             | 1                        | 0.870 |
| Celecoxib/DiMe- $\beta$ -CD          | 1                        | 0.870 |
| Celecoxib/HP $\beta$ -CD             | 1                        | 0.870 |
| Celecoxib/Rme- $\beta$ -CD           | 1                        | 0.870 |
| Celecoxib/SBE- $\beta$ -CD           | 1                        | 0.870 |
| Celecoxib/ $\gamma$ -CD              | 1                        | 0.870 |
| Dexibuprofen/ $\beta$ -CD            | 2                        | 1.739 |
| Diclofenac/HP $\beta$ -CD            | 5                        | 4.348 |
| Diclofenac/Me- $\beta$ -CD           | 1                        | 0.870 |
| Diclofenac/ $\alpha$ -CD             | 1                        | 0.870 |
| Diclofenac/ $\beta$ -CD              | 3                        | 2.609 |
| Diclofenac/ $\gamma$ -CD             | 1                        | 0.870 |
| Etodolac/HP $\beta$ -CD              | 2                        | 1.739 |
| Etodolac/Me- $\beta$ -CD             | 1                        | 0.870 |
| Etodolac/ $\beta$ -CD                | 1                        | 0.870 |
| Etoricoxib/HP $\beta$ -CD            | 1                        | 0.870 |
| Etoricoxib/ $\beta$ -CD              | 1                        | 0.870 |
| Fenoprofen/TA- $\beta$ -CD           | 1                        | 0.870 |
| Flufenamic Acid/ $\beta$ -CD         | 1                        | 0.870 |
| Flurbiprofen/2-HB-CD                 | 1                        | 0.870 |
| Flurbiprofen/HP $\beta$ -CD          | 6                        | 5.217 |
| Flurbiprofen/SBE- $\beta$ -CD        | 1                        | 0.870 |
| Flurbiprofen/ $\beta$ -CD            | 3                        | 2.609 |
| Ibuprofen/HP $\beta$ -CD             | 2                        | 1.739 |
| Ibuprofen/ $\beta$ -CD               | 4                        | 3.478 |
| Ibuprofen/ $\gamma$ -CD              | 2                        | 1.739 |
| Indomethacin/HP $\beta$ -CD          | 3                        | 2.609 |
| Indomethacin/ $\alpha$ -CD           | 1                        | 0.870 |
| Indomethacin/ $\beta$ -CD            | 1                        | 0.870 |
| Indomethacin/ $\gamma$ -CD           | 1                        | 0.870 |
| Ketoprofen/EPI-CM $\beta$ CD         | 1                        | 0.870 |
| Ketoprofen/EPI- $\beta$ CD           | 1                        | 0.870 |
| Ketoprofen/HP $\beta$ -CD            | 1                        | 0.870 |
| Ketoprofen/ $\beta$ -CD              | 2                        | 1.739 |
| Lornoxicam/HP $\beta$ -CD            | 1                        | 0.870 |
| Lornoxicam/ $\beta$ -CD              | 3                        | 2.609 |

**Table 4. Frequencies for Complexation**

| <b>Complexation</b>        | <b>Frequency Percent</b> |         |
|----------------------------|--------------------------|---------|
| Meloxicam/HP $\beta$ -CD   | 3                        | 2.609   |
| Meloxicam/ $\beta$ -CD     | 9                        | 7.826   |
| Mesalazine/HP $\beta$ -CD  | 1                        | 0.870   |
| Naproxen/HP $\beta$ -CD    | 1                        | 0.870   |
| Naproxen/ $\beta$ -CD      | 2                        | 1.739   |
| Nepafenac/HP $\beta$ -CD   | 3                        | 2.609   |
| Nepafenac/ $\gamma$ -CD    | 1                        | 0.870   |
| Nimesulide/Me- $\beta$ -CD | 1                        | 0.870   |
| Oxaprozin/Me- $\beta$ -CD  | 2                        | 1.739   |
| Oxaprozin/Rme- $\beta$ -CD | 4                        | 3.478   |
| Oxaprozin/ $\beta$ -CD     | 1                        | 0.870   |
| Piroxicam/HP $\beta$ -CD   | 4                        | 3.478   |
| Piroxicam/Me- $\beta$ -CD  | 1                        | 0.870   |
| Piroxicam/ $\beta$ -CD     | 7                        | 6.087   |
| Sulindac/ $\beta$ -CD      | 1                        | 0.870   |
| Zaltoprofen/HP $\beta$ -CD | 1                        | 0.870   |
| Zaltoprofen/ $\beta$ -CD   | 1                        | 0.870   |
| Total                      | 115                      | 100.000 |
